# Supplementary material
Source: PubMed Central journal article supplement (PMC2922945)
Supplement: NIHMS221544-supplement.pdf [file NIHMS221544-supplement.pdf]

## Supplementary Figure Legend

**Figure S1.** Overexpression of *PfHRPIImyc* does not affect its PEXEL processing. (A) Overexpressed *PfHRPIImyc* enriched from the saponin supernatant of trophozoite-infected RBCs was subjected to an Asp-N in-digestion and analyzed by MALDI-TOF MS. The inset Coomassie-stained gel (left) and anti-c-Myc Western blot (right) confirms the enriched protein. The gel band was excised for proteolysis because of contaminating red cell proteins. The peptide fragment at  $m/z$  1953.87 (\*) was selected for tandem MS analysis. (B) *De novo* sequencing of *PfHRPIImyc*  $m/z$  1953.87. CID analysis reveals that  $m/z$  1953.87 is the most N-terminal peptide fragment and demonstrates that the PEXEL in *PfHRPIImyc* is also cleaved after residue 47 (<sup>45</sup>RLL↓) and the mature N-terminus is N-acetylated (Ac-HE<sup>49</sup>). Residues in the sequenced peptide that are bold and underlined are a part of the *PfHRPIImyc* PEXEL motif.

Figure S1

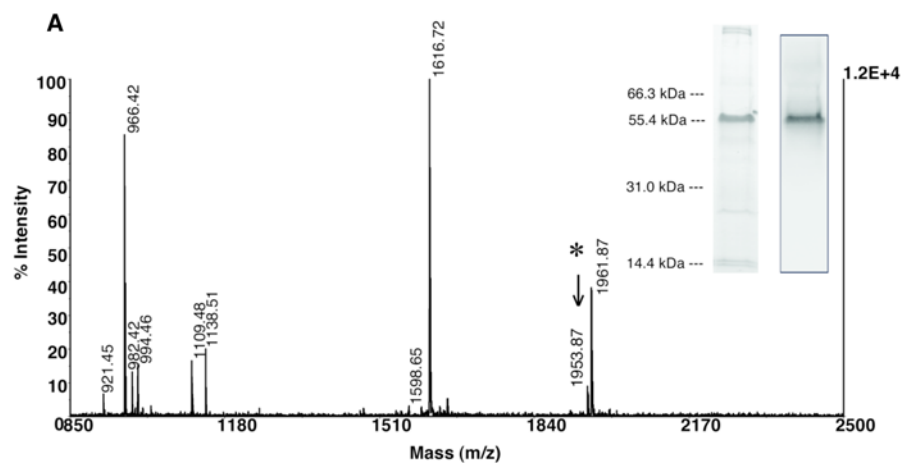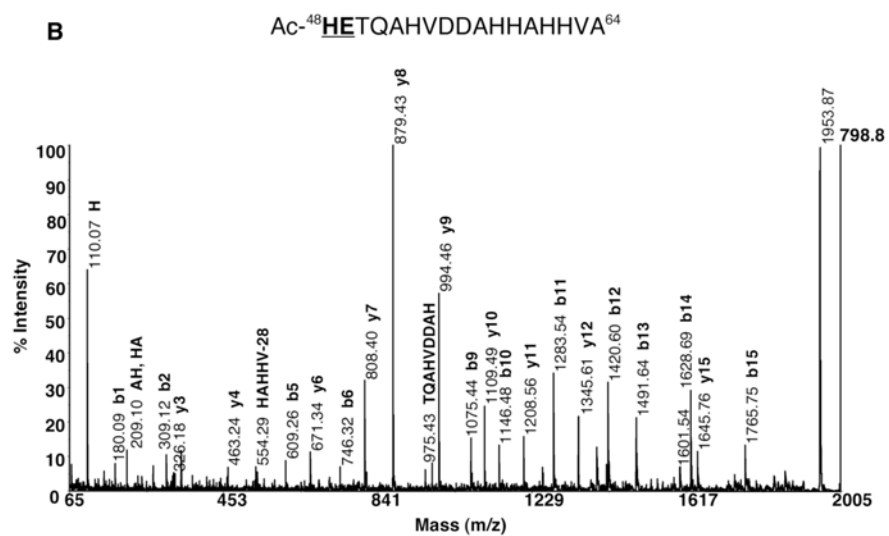

**Table S1.** Peptide fragments were obtained from an Asp-N solution digest of *Pf*HRPII purified from saponin supernatant and analyzed by MALDI-TOF MS. The *m/z* and corresponding amino acid sequence in the full-length sequence is according to GenBank accession no. [AAC47453](#).

| <u><i>m/z</i></u> | <u>Amino acid sequence represented</u> |
|-------------------|----------------------------------------|
| 966.42            | 65-100, 191-199, 266-274               |
| 994.46            | 56-64                                  |
| 1138.51           | 275-285                                |
| 1223.53           | 218-229, 248-259                       |
| 1253.54           | 179-190, 206-265                       |
| 1598.69           | 185-199, 260-274                       |
| 1616.72           | 134-148, 164-178                       |
| 1855.79           | 206-265                                |
| 1913.84           | 65-100                                 |
| 1941.87           | 56-73                                  |
| 1953.87           | 48-64                                  |
| 2085.92           | 266-285                                |
| 2200.95           | 179-199, 254-274                       |
| 2458.05           | 206-259                                |

# amino acids in *Pf*HRPII = 309

# amino acids after PEXEL processing = 262

# amino acids covered = 184

sequence coverage =  $184/262 = 70\%$

**Table S2.** Peptide fragments were obtained from an Asp-N in-gel digest of *Pf*HRPIImyc enriched from saponin supernatant and analyzed by MALDI-TOF MS. The *m/z* and corresponding amino acid sequence in the full-length sequence is according to GenBank accession no. [AAC47453](#) and a C-terminal c-Myc tag.

| <u><i>m/z</i></u> | <u>Amino acid sequence represented</u> |
|-------------------|----------------------------------------|
| 966.42            | 65-100, 191-199, 266-274               |
| 982.42            | 119-127, 149-157                       |
| 994.46            | 56-64                                  |
| 1109.48           | 55-64                                  |
| 1138.51           | 275-285                                |
| 1253.54           | 179-190, 206-265                       |
| 1598.65           | 185-199, 260-274                       |
| 1616.72           | 134-148, 164-178                       |
| 1953.87           | 48-64                                  |
| 1961.87           | 101-118                                |

# amino acids in *Pf*HRPIImyc = 319

# amino acids after PEXEL processing = 272

# amino acids covered = 220

sequence coverage =  $220/272 = 81\%$

**Table S3.** Peptide fragments were obtained from an Asp-N in-gel digest of *PfHRPIImyc* enriched from the ER of BFA-treated ring parasites and analyzed by MALDI-TOF MS. The *m/z* and corresponding amino acid sequence in the full-length sequence is according to GenBank accession no. [AAC47453](#) and a C-terminal c-Myc tag.

| <u><i>m/z</i></u> | <u>Amino acid sequence represented</u> |
|-------------------|----------------------------------------|
| 863.40            | 48-54                                  |
| 966.42            | 65-100, 191-199, 266-274               |
| 1109.48           | 55-64                                  |
| 1138.51           | 275-285                                |
| 1223.53           | 218-229, 248-259                       |
| 1253.54           | 179-190, 206-265                       |
| 1584.68           | 119-133, 149-163                       |
| 1598.69           | 185-199, 260-274                       |
| 1616.72           | 134-148, 164-178                       |
| 1770.78           | 275-291                                |
| 1855.79           | 206-265                                |
| 1913.84           | 65-100                                 |
| 1953.87           | 48-64                                  |
| 1961.87           | 101-118                                |
| 2200.95           | 179-199, 254-274                       |

# amino acids in *PfHRPIImyc* = 319

# amino acids after PEXEL processing = 272

# amino acids covered = 238

sequence coverage =  $238/272 = 88\%$

**Table S4.** Peptide fragments were obtained from an Asp-N in-gel digest of KAHRP(1-60)-GFP enriched from saponin supernatant and analyzed by MALDI-TOF MS. The *m/z* and corresponding amino acid sequence is according to Wickham *et al.* [12]. The amino acid numbering starts from the N-terminus after PEXEL processing.

| <u><i>m/z</i></u> | <u>Amino acid sequence represented</u> |
|-------------------|----------------------------------------|
| 1172.53           | 185-194                                |
| 1370.80           | 122-133                                |
| 1463.71           | 202-214                                |
| 1518.68           | 26-40                                  |
| 1728.81           | 107-121                                |
| 1890.03           | 122-137                                |
| *1941.95          | 221-238                                |
| 2155.10           | 195-214                                |
| ^2182.23          | 160-177                                |
| 2203.07           | 202-220                                |
| *2440.20          | 87-106                                 |
| 2565.21           | 138-159                                |
| 2580.43           | 1-23                                   |
| ^2851.55          | 160-184                                |

# amino acids in processed KAHRP(1-60)-GFP = 243

# amino acids covered = 184

sequence coverage =  $184/243 = 76\%$

\*The peptides have corresponding peptides with oxidized Met (+16.00) at 1957.95 and 2456.20, respectively.

^NG turns into DG during the ionization process to add 1.01 amu.
